# Supplementary material for: Enantiopure anion templated synthesis of a zeolitic metal–organic framework
Source: Royal Society of Chemistry journal article supplement (doi:10.1039/c5cc09308b), 2015-12-02
Supplement: c5cc09308b1.pdf [file c5cc09308b1.pdf]

*Electronic Supplementary Information (ESI) for*

# Enantiopure anion templated synthesis of zeolitic metal–organic framework

*Zhong-Xuan Xu<sup>†,‡</sup>, Yu-Lu Ma<sup>§</sup>, and Jian Zhang<sup>†,\*</sup>*

<sup>†</sup> State Key Laboratory of Structural Chemistry, Fujian Institute of Research on the  
Structure of Matter, the Chinese Academy of Sciences, Fuzhou, Fujian 350002, P. R.  
China

<sup>‡</sup> Department of Chemistry, Zunyi Normal College, Zunyi, 563002, P. R. China

<sup>§</sup> School of Chemical Science and Technology, Yunnan University, Kunming, 650091,  
P. R. China

*E-mail: [zhj@fjirsm.ac.cn](mailto:zhj@fjirsm.ac.cn)*

## Experimental Section

**General information:** In this paper, all the chemical reagents were purchased from Energy-Chemical and used without further purification. The chiral compound (*R*)-H<sub>3</sub>CIA ((*S*)-H<sub>3</sub>CIA) was synthesized from L-(*-*)-lactic acid methyl ester (D-(*-*)-lactic acid methyl ester) and dimethyl 5-hydroxyisophthalate by our group. <sup>1</sup>H NMR (400 MHz) and <sup>13</sup>C NMR (100 MHz) spectra were recorded in deuterated trifluoroacetic acid (TFA-D,  $\delta$  11.50) solutions using a Bruker AVANCE 400 spectrometer. Chemical shifts are reported as  $\delta$  values in parts per million (ppm) relative to tetramethylsilane (TMS) for all recorded NMR spectra. Elemental analysis was carried out by the analysis center of our institute. FT-IR spectrum was measured as KBr pellets on a Nicolet Magna 750 FT-IR spectrometer in the range of 400~4000cm<sup>-1</sup>. The powder X-ray diffraction (PXRD) analysis was recorded on a Rigaku Dmax2500 diffractometer with Cu K $\alpha$  radiation ( $\lambda$  =1.54056Å) from 5.00–50.00°. Thermal stability study was performed on a NETSCHZ STA-449C thermoanalyzer with a heating rate of 10°C/min in a range of 30–800°C under nitrogen and atmosphere. Luminescence spectra were recorded on a Shimadzu RF-5301 spectrophotometer.

**Measurements of solid CD spectra:** The mixture of sample and 100 mg dry KCl powder was well grounded and then pressed into a disk for the CD measurement with a MOS-450 spectropolarimeter.

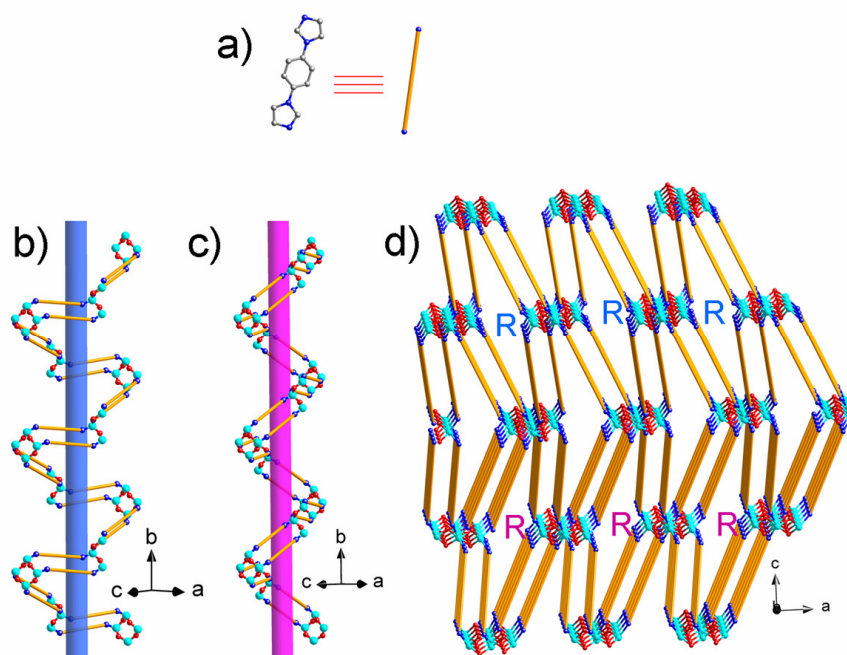

**Figure S1.** Schematic illustrations of complex **1-D**: a) the 1,4-DIB ligand is simplified as a line; b) the right-handed helical A-chain in complex **1-D**; c) the right-handed helical B-chain in complex **1-D**; d) the 3D framework of **1-D** consisting of two types of right-handed helical chains along b-axis.

Absolute helicity often goes with chirality in some compounds, such as proteins, nucleic acids, carbohelicenes and so on, which is a special form of one-dimensional chirality. Such a phenomenon also exists in complex **1-D** and one of prominent structural features is the presence of two types of helical chains: right-handed helical A-chain and right-handed helical B-chain (Figure S1), dictated by the chirality of induction agent. As depicted in Figure 2b-c, two types of helical chains were all built from  $\text{Zn}_4(\mu_2\text{-OH})_4$  units and parallel 1,4-DIB ligands running along the b-axis. These helixes are generated around the crystallographic  $4_3$  screw axis and contain four  $\text{Zn}_4(\mu_2\text{-OH})_4$  units and four pairs of 1,4-DIB ligands per turn, respectively. As a result, these helical chains formed a 3D cationic homochiral framework at a ratio of 1:1.

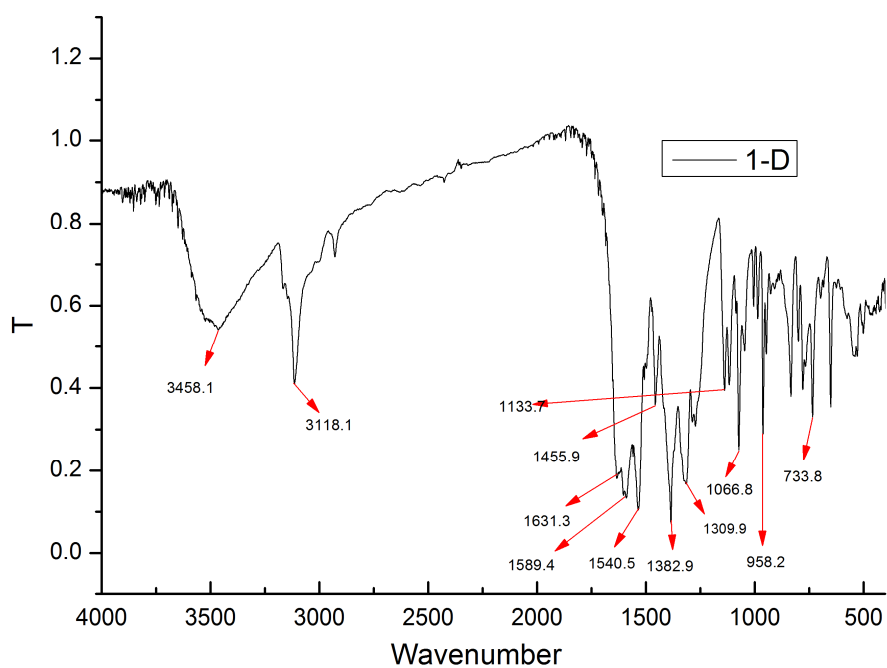

**Figure S2.** The IR spectra of **1-D**

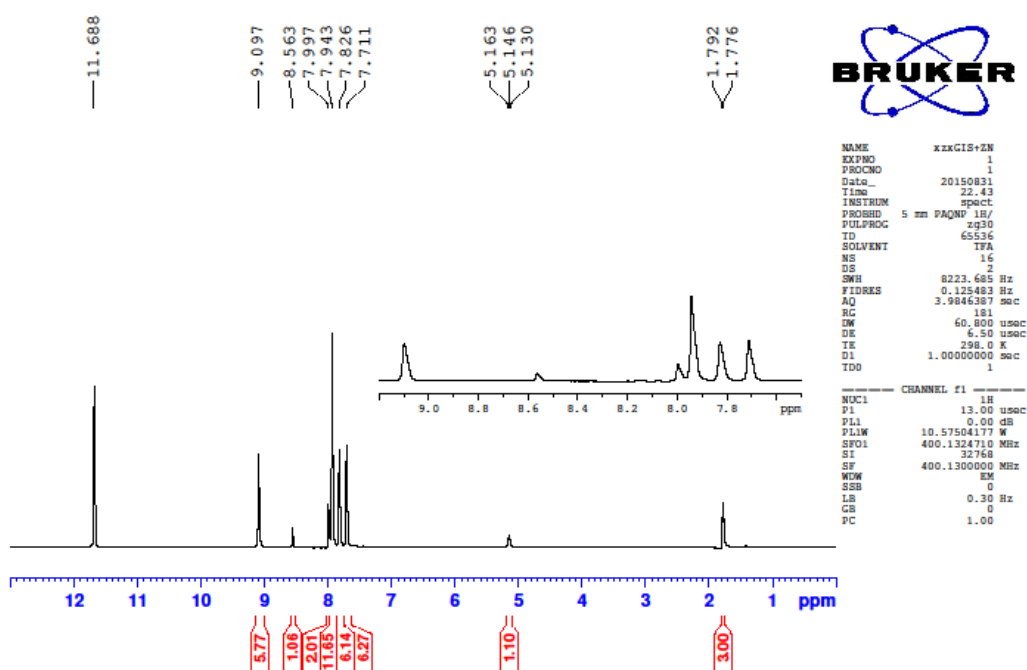

**Figure S3.** <sup>1</sup>H NMR spectra of **1-D** in TFA-D

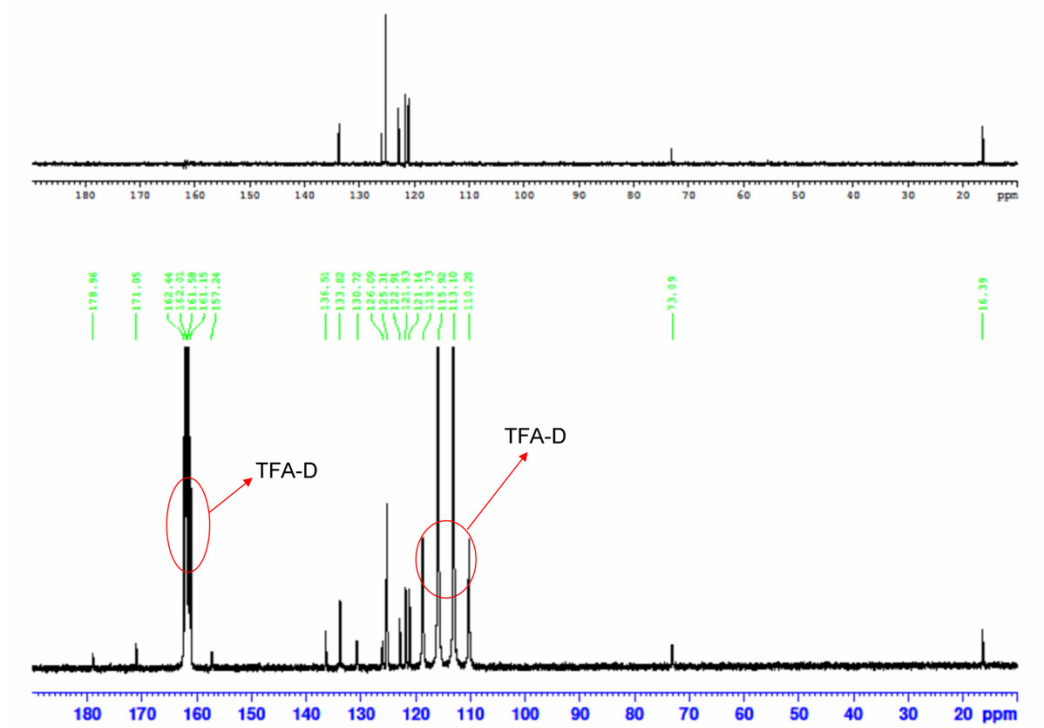

**Figure. S4**  $^{13}\text{C}$  NMR spectra of **1-D** in TFA-D

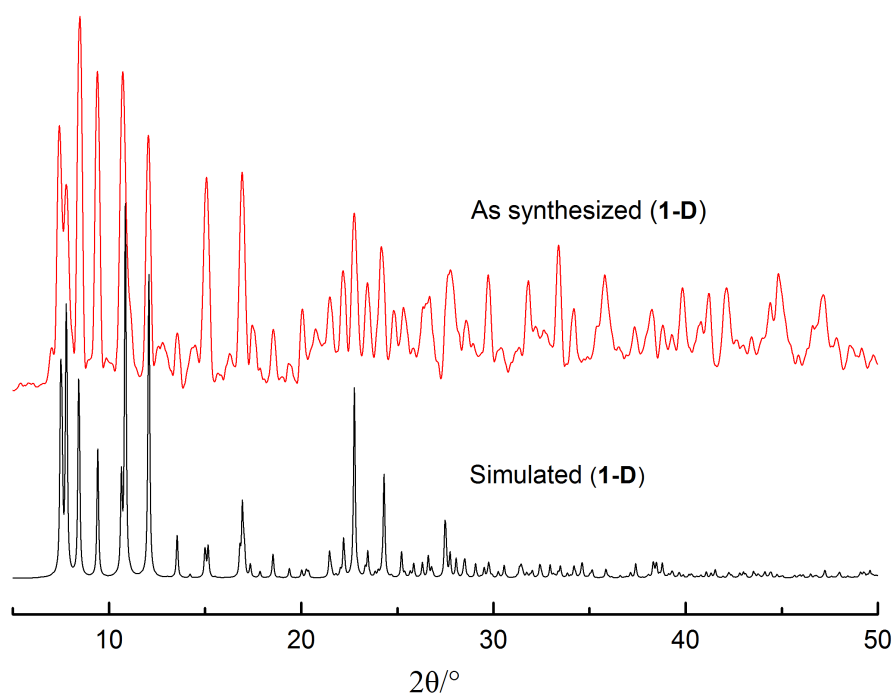

**Figure S5.** PXRD patterns of **1-D**

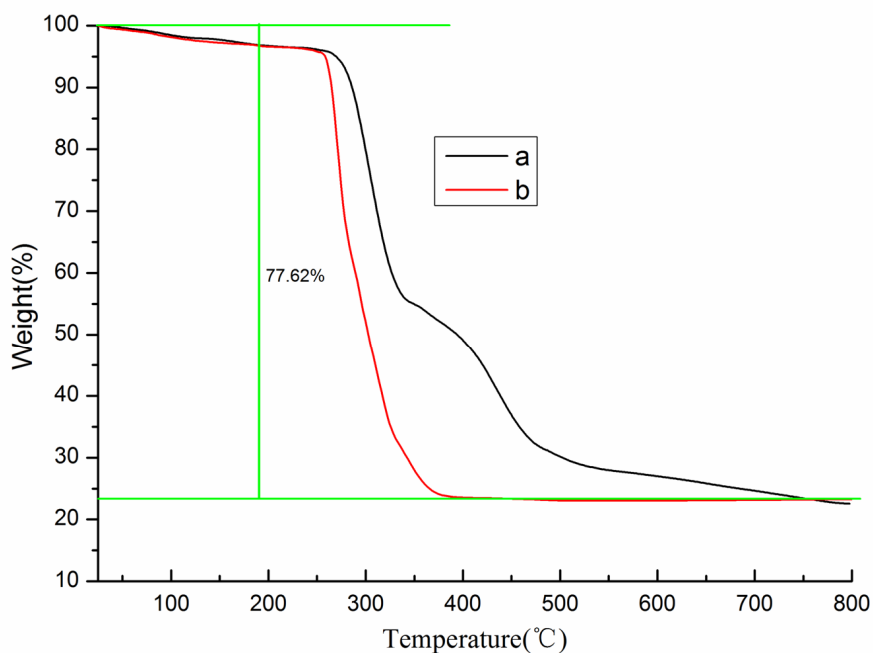

**Figure S6.** Thermogravimetric diagram of **1-D** under nitrogen (a) and atmosphere (b)

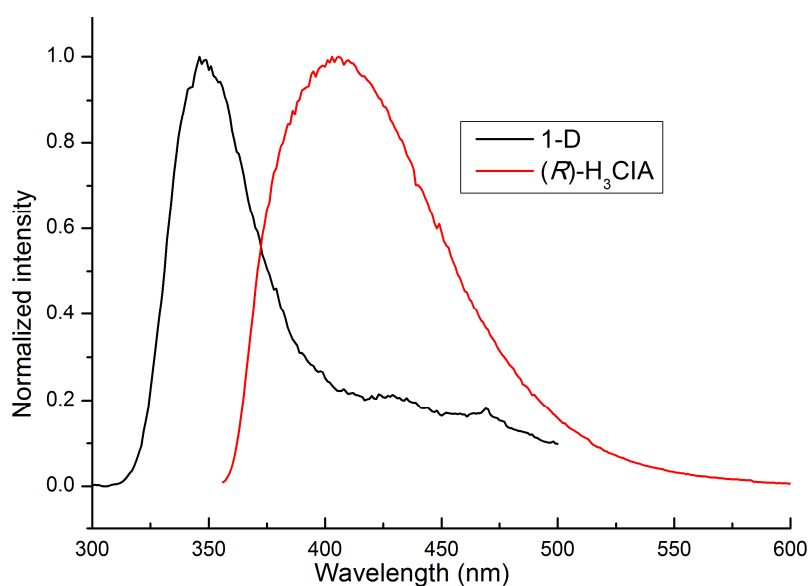

**Figure S7.** The fluorescent emission spectra of **1-D** and *(R)*-H<sub>3</sub>CIA

At room temperature the photoluminescence properties of **1-D** were studied in the solid state. Excitation of the microcrystalline sample of **1-D** at 270 nm produces the intense luminescence with the peak maxima at 349 nm. In order to understand the nature of above emission band better, the photoluminescent property of guest molecule *(S)*-H<sub>3</sub>CIA is also tested. As shown in Figure S6, upon excitation at 336 nm, *(S)*-H<sub>3</sub>CIA has similar emissions at 404 nm. In comparison to *(R)*-H<sub>3</sub>CIA ligand, the

emission maxima in **1-D** has changed and indicates blue shift, which may be attributed to a charge transfer transition between cationic frameworks and anionic guest molecules.<sup>1</sup>

**References:**

1. (a) Z. C. Hu, B. J. Deibert, J. Li, *Chem. Soc. Rev.*, 2014, **43**, 5815; (b) Y. J. Cui, Y. F. Yue, G. D. Qian, B. L. Cheng, *Chem. Rev.*, 2012, **112**, 1126.
